# Supplementary material for: Intrastromal Corneal Ring Segments for Astigmatism Correction after Deep Anterior Lamellar Keratoplasty
Source: Hindawi journal article supplement (doi:10.1155/2017/8689017), 2017-01-01
Supplement: f1 [file 8689017.f1.pdf]

| PACIENTE                           | DATA CIRURGIA | OLHO | REFRAÇÃO PRÉ       | REFRAÇÃO PÓS       | AV PRÉ | AV PÓS | SEGMENTO |
|------------------------------------|---------------|------|--------------------|--------------------|--------|--------|----------|
| SAULO SAMUEL DE PAIVA VILELA       | 20/06/12      | OE   | -1.25 (-4.75X150°) | +1.00 (-1.50X180°) | 20/40  | 20/30  | 2X160/20 |
| WILLIAN MACHADO OLIVEIRA           | 20/06/12      | OE   | -6.50 (-3.50X140°) | -2.50 (-2.00X15°)  | 20/40  | 20/30  | 2X160/20 |
| ANDREIA MARIA MONTEIRO SILVA       | 04/07/12      | OD   | -1.00 (-7.00X25°)  | +2.50 (-3.50X20°)  | 20/50  | 20/30  | 2X160/20 |
| CARLOS GILBERTO ARCANGELO          | 04/07/12      | OD   | -2.00 (-8.00X130°) | +1.00 (-4.00X155°) | 20/60  | 20/40  | 2X160/20 |
| ROSE DA CONCEIÇÃO DOS ANJOS        | 08/08/2012    | OD   | PLANO (-6.00X60°)  | +0.50 (-4.00X40°)  | 20/30  | 20/30  | 1X160/20 |
| GUSTAVO GUIMARAES FONSECA          | 08/08/2012    | OD   | PLANO (-8.00X50°)  | +3.00 (-4.00X45°)  | 20/40  | 20/40  | 2X160/20 |
| ODIM DONATO FILHO                  | 17/08/2012    | OD   | +1.00 (-7.00X90°)  | +2.50 (-4.00X93)   | 20/40  | 20/30  | 2X160/20 |
| PRISCILA GONÇALVES GARCIA          | 22/08/2012    | OD   | -3.50 (-1.50X45°)  | -1.50 (-2.00X15°)  | 20/30  | 20/30  | 1X160/20 |
| JOAO BOSCO NASCIMENTO SOUZA SANTOS | 05/09/2012    | OE   | +2.00 (-5.00X120°) | +1.50 (-1.50X15°)  | 20/50  | 20/20  | 2X140/20 |
| JULIA MARIA BARBOSA                | 05/09/2012    | OE   | -2.50 (-3.00X25°)  | +2.00 (-2.00X90°)  | 20/30  | 20/30  | 2X160/20 |
| ELIZA MARIA SEVERINO FIGUEIREDO    | 26/09/2012    | OE   | -2.00 (-3.00X80°)  | +0.50 (-2.00X75°)  | 20/40  | 20/30  | 2X160/20 |
| MATHEUS LEONIDAS SILVA             | 03/10/2012    | OD   | PLANO (-3.50X145°) | +1.00 (-2.00X30°)  | 20/30  | 20/25  | 2X160/20 |
| JORGE DA PENHA DE FREITAS          | 11/11/2012    | OD   | PLANO (-5.50X15°)  | +2,50 (-2.00X15°)  | 20/40  | 20/30  | 2X160/20 |
| ELAINE APARECIDA RESENDE DIAS      | 24/10/2012    | OE   | +2.50 (-5.00X145°) | +4.00 (-0.50X105°) | 20/40  | 20/40  | 2X160/20 |
| ANGELICA DAS GRACAS GOMES SANTOS   | 24/10/2012    | OE   | +2.00 (-8.00X150°) | +3.50 (-3.50X155°) | 20/50  | 20/50  | 2X160/20 |
| SUELI ELISABETE DIAS               | 24/10/2012    | OE   | +0.75 (-6.00X10°)  | +1.75 (-1.75X50°)  | 20/50  | 20/40  | 2X160/20 |
| SIRLEI JULIANA DIAS                | 24/10/2012    | OE   | -4.25 (-3.75X150°) | -2.00 (-1.50X135°) | 20/40  | 20/30  | 2X160/20 |
| JASON FRANCIS RODRIGUES DA SILVA   | 31/10/2012    | OE   | -2.50 (-6.00X180°) | -1.00 (-3.50X15°)  | 20/40  | 20/25  | 2X160/20 |
| JASON FRANCIS RODRIGUES DA SILVA   | 14/11/2012    | OD   | +2.00 (-6.00X180°) | +2.25 (-1.75X180°) | 20/50  | 20/20  | 2X140/20 |
| MARCUS VINICIUS REIS DE FREITAS    | 14/10/2012    | OE   | -2.75 (-3.00X20°)  | -0.75 (-2.00X10°)  | 20/30  | 20/30  | 1X160/20 |
| SALIME GUALBERTO DA ROCHA JUNIOR   | 10/09/2013    | OE   | -6.00 (-6.00X175°) | -4.25 (-2.00X65°)  | 20/40  | 20/25  | 2X160/20 |
| LARA DRUMMOND PAIVA                | 11/07/2013    | OE   | +2.00 (-6.00X20°)  | +2.50 (-2.00X20°)  | 20/40  | 20/30  | 2X140/20 |
| TIAGO SOUSA RAMOS                  | 11/05/2013    | OE   | +4.50 (-4.50X20°)  | -0.50 (-3.25X55°)  | 20/50  | 20/30  | 2X140/20 |
| JAMERSON DE MATOS ASSIS SOUZA      | 11/03/2013    | OE   | -5.00 (-8.00X30°)  | -3.50 (-5.00X180°) | 20/80  | 20/40  | 2X160/20 |
| ANTONIO FERREIRA DOS SANTOS FILHO  | 09/01/2013    | OE   | -3.00 (-4.50X20°)  | -2.00 (-2.00X120°) | 20/60  | 20/30  | 2X160/20 |



| CERATOMETRIA PRÉ           | CERATOMETRIA PÓS       | IDADE |
|----------------------------|------------------------|-------|
| 48.60@62° / 46.66@152°     | 47.71@131° / 47.22@41° | 39    |
| 44.96@56° / 43.45@146°     | 41.49@88° / 40.99@178° | 29    |
| 48.94@116° / 44.91@26°     | 44.95@111° / 42.34@21° | 31    |
| 49.43@33° / 45.67@123°     | 48.30@67° / 47.15@157° | 50    |
| 45.74@155° / 40.81@65°     | 43.49@133° / 40.12@43° | 44    |
| 45.86@139° / 41.46@49°     | 39.69@133° / 35.73@43° | 35    |
| 47.57@179° / 41.64@89°     | 39.24@10° / 36.26@100° | 50    |
| 47.82@133° / 45.84@43°     | 46.47@157° / 45.18@67° | 27    |
| 42.73@31° / 40.37@121°     | 40.65@80° / 39.58@170° | 31    |
| 46.08@105° / 44.99@15°     | 42.50@180° / 40.50@90  | 36    |
| 45.28@169° / 42.88@79°     | 43.27@83° / 42.78@173° | 48    |
| 43.88@53° / 42.19@143°     | 40.21@116° / 39.70@26° | 24    |
| 44.07 @ 23° / 47.87 @ 113° | 41.94@175° / 43.32@85° | 54    |
| 44.57@48° / 42.50@138°     | 38.69@11° / 38.15@101° | 32    |
| 47.34@59° / 41.66@149°     | 39.82@63° / 37.15@153° | 33    |
| 45.99@97° / 41.90@7°       | 43.26@93° / 41.02@3°   | 45    |
| 46.71@60° / 43.80@150°     | 42.36@104° / 41.97@14° | 35    |
| 51.93@69° / 45.23@159°     | 47.37@115° / 46.30@25° | 20    |
| 45.93@106° / 40.95@18°     | 40.05@98° / 38.13@8°   | 20    |
| 48.99@110° / 46.78@20°     | 44.54@67° / 42.44@157° | 36    |
| 44.21 @ @168° / 49.63@78°  | 44.99@174 / 49.18@84°  | 34    |
| 42.30@10° / 48.60@100°     | 44.90@15° / 47.10@105° | 35    |
| 41.64@39° / 43.49@27°      | 44.04@39° / 46.16@129° | 36    |
| 41.39@23° / 49.12@113°     | 38.19@180° / 42.11@90° | 37    |
| 46.0@110° / 52.9@20°       | 48.0@120° / 50.9@10°   | 38    |
